# Supplementary material
Source: Springer Nature journal article supplement (https://www.springermedizin.de/resource/supplementary/12879_2012_1948_MOESM2_ESM.pdf/9443344)

Concentration of anti-PT IgG (IU/mL)

250.00  
200.00  
150.00  
100.00  
50.00  
0.00

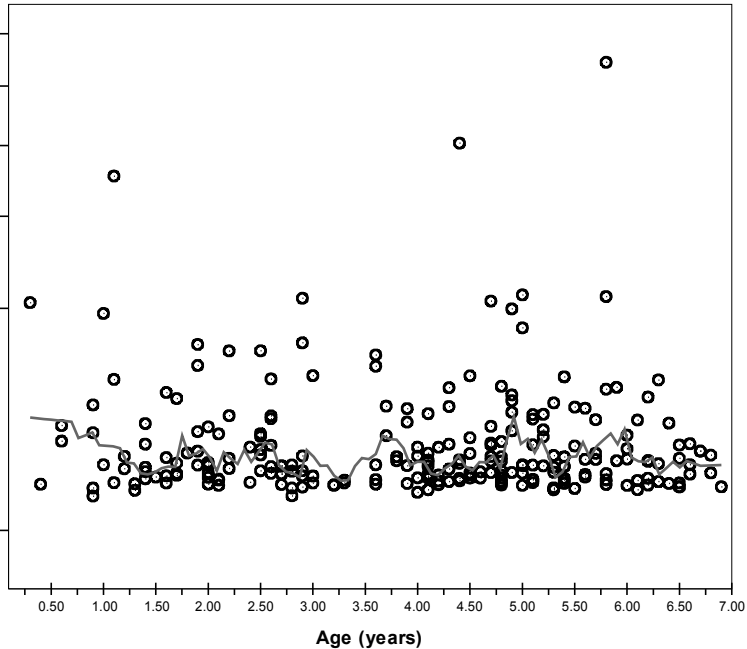

Supplement: MOESM2 [file 9443344]
